# Supplementary material for: A two-dimensional α-As/α-AsP van der Waals heterostructure for photovoltaic applications
Source: Royal Society of Chemistry journal article supplement (doi:10.1039/d2cp01540d), 2022-01-01
Supplement: d2cp01540d1.pdf [file d2cp01540d1.pdf]

## Supplementary Material

### Two-dimensional $\alpha$ -As/ $\alpha$ -AsP van der Waals heterostructure for photovoltaic applications

Yuliang Mao<sup>a,c,†</sup>, Chuangqing Qin<sup>a</sup>, Jing Wang<sup>b,c</sup>, Jianmei Yuan<sup>b,c,†</sup>

<sup>a</sup> Hunan Key Laboratory for Micro–Nano Energy Materials and Devices, School of Physics and Optoelectronic, Xiangtan University, Hunan 411105, China.

<sup>b</sup> Hunan Key Laboratory for Computation and Simulation in Science and Engineering, School of Mathematics and Computational Science, Xiangtan University, Hunan 411105, China.

<sup>c</sup> Hunan National Center for Applied Mathematics, Hunan 411105, China.

† Corresponding authors, E-mail address: ylmao@xtu.edu.cn; yuanjm@xtu.edu.cn

1. Phonon dispersion of AB stacking two-dimensional  $\alpha$ -As/ $\alpha$ -AsP van der Waals heterostructure under 300 K.

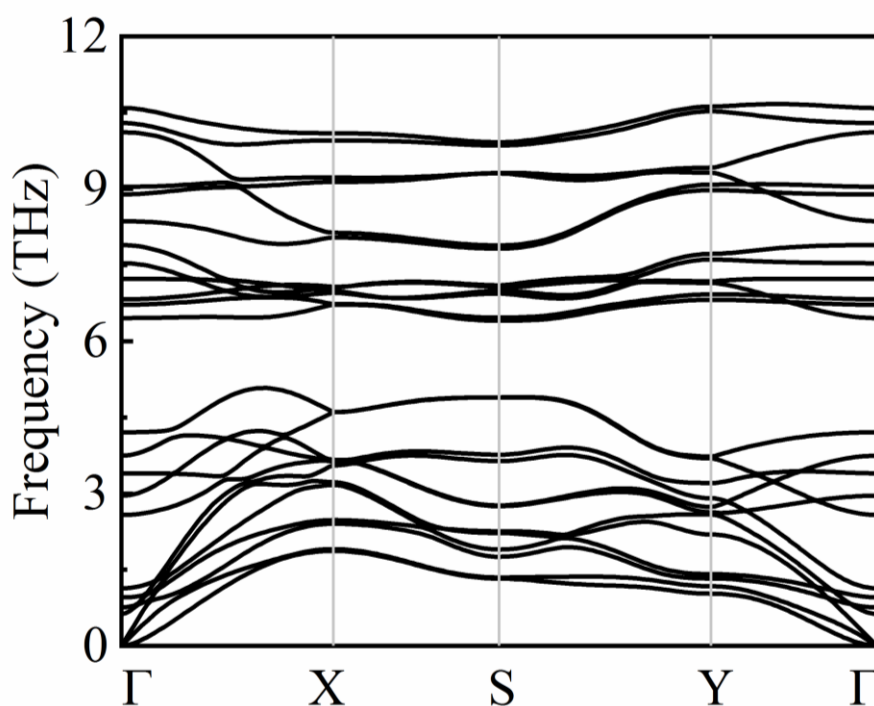

**Fig. S1** Phonon dispersion of AB stacking two-dimensional  $\alpha$ -As/ $\alpha$ -AsP van der Waals heterostructure under 300 K.

2. Total energy fluctuations in the MD simulations under 500K.

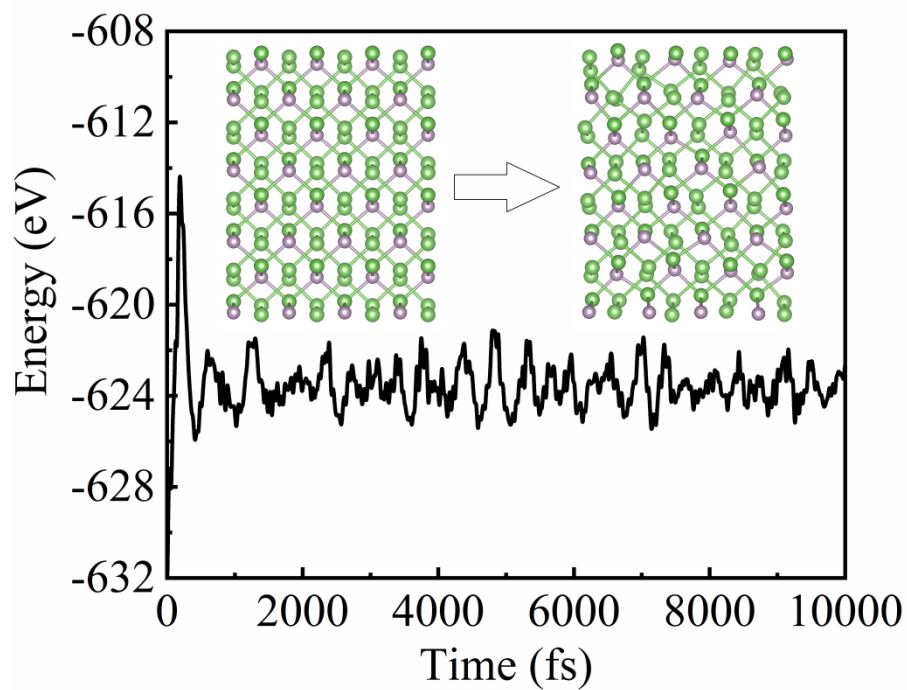

**Fig. S2** Total energy fluctuations in the MD simulations under 500K. The insets show snapshots of the structures after 10000 fs.
